# Supplementary material
Source: PubMed Central journal article supplement (PMC2828891)
Supplement: 97320630004119S1.pdf [file 97320630004119S1.pdf]

## Supplementary material

**Table 1:** Discovered SNP results of Zingiber officinale.

| Tissue Name  | Sequences analysed | No of contigs | Consensus size | SNPs detected | Transitions (Ts) | Transversions (Tv) | Indels      | Ts / Tv     | SNP frequency      |
|--------------|--------------------|---------------|----------------|---------------|------------------|--------------------|-------------|-------------|--------------------|
| Leaves       | 11307              | 2660          | 2555383        | 16046         | 6805             | 7258               | 1983        | 0.94        | 0.63/100 bp        |
| Rhizomes     | 10123              | 2921          | 2668324        | 28809         | 13433            | 12249              | 3127        | 1.10        | 1.08/100 bp        |
| Root         | 10475              | 2972          | 2332434        | 19171         | 6845             | 10402              | 1924        | 0.66        | 0.82/100 bp        |
| <b>Total</b> | <b>31905</b>       | <b>8553</b>   | <b>7556141</b> | <b>64026</b>  | <b>27083</b>     | <b>29909</b>       | <b>7034</b> | <b>0.90</b> | <b>0.84/100 bp</b> |

A total of 31905 consensus EST sequence are used to predict the SNP site from Ginger species, which made 8553 cluster groups and found 64026 SNP/indel sites.

**Table 2:** Summary of SNPs and indels detected in the Ginger EST libraries

| Results                    | Leaves  | Rhizomes | Root    | Total   |
|----------------------------|---------|----------|---------|---------|
| Total No. of ESTs          | 13274   | 12763    | 12092   | 38129   |
| Total sequences analysed   | 11307   | 10123    | 10475   | 31905   |
| No. of contigs             | 2660    | 2921     | 2972    | 8553    |
| Total SNPs detected        | 16046   | 28809    | 19171   | 64026   |
| Total consensus size (bp)  | 2555383 | 2668324  | 2332434 | 7556141 |
| Frequency of SNP per 100bp | 0.63    | 1.08     | 0.82    | 0.84    |
| Transitions                |         |          |         |         |
| G/A                        | 3595    | 6901     | 3278    | 13774   |
| C/T                        | 3210    | 6532     | 3567    | 13309   |
| Tranversions               |         |          |         |         |
| A/C                        | 1822    | 3200     | 2617    | 7639    |
| A/T                        | 1678    | 2550     | 2704    | 6932    |
| G/T                        | 1917    | 3065     | 2553    | 7535    |
| G/C                        | 1841    | 3434     | 2528    | 7803    |
| Indel                      |         |          |         |         |
| A                          | 564     | 818      | 623     | 2005    |
| G                          | 504     | 772      | 547     | 1823    |
| T                          | 433     | 743      | 361     | 1537    |
| C                          | 482     | 794      | 393     | 1669    |
| Shannon Index              | 0.150   | 0.152    | 0.164   | 0.052   |

$$H' = -\sum_{i=1}^n p_i \log_2 p_i$$

Where n is the total number of SNP/indel states (10) pi= proportion of ESTs in the i<sup>th</sup> type of SNP/indel state. The calculated value is divided by the log<sub>2</sub>10 to get uniformity.
